# Supplementary material for: Co-loading of coralyne and indocyanine green into adenine DNA-functionalized mesoporous silica nanoparticles for pH- and near-infrared-responsive chemothermal treatment of cancer cells
Source: Royal Society of Chemistry journal article supplement (doi:10.1039/c4tb01040j), 2014-07-16
Supplement: c4tb01040j1.pdf [file c4tb01040j1.pdf]

## Supporting Information

### Co-loading of coralyne and indocyanine green into the adenine DNA functionalized mesoporous silica nanoparticles for the pH- and near-infrared-responsive chemothermal treatment of cancer cells

Mian Chen,<sup>§</sup> Shuna Yang,<sup>§</sup> Xiaoxiao He,<sup>\*</sup> Kemin Wang,<sup>\*</sup> Pengchao Qiu, and Dinggeng He

E-mail: kmwang@hnu.edu.cn; xiaoxiaohe@hnu.edu.cn <sup>§</sup>: These authors contributed equally.

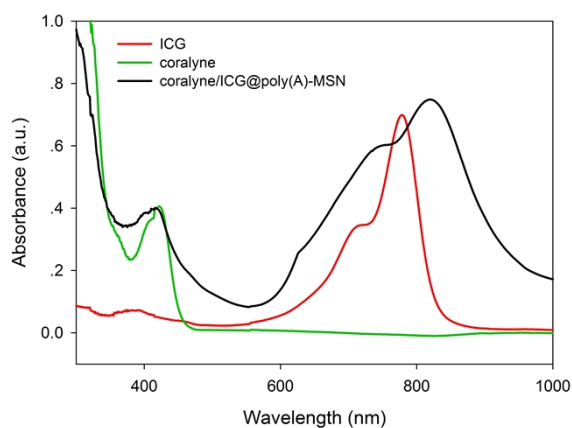

**Fig. S1** The absorption spectrum of coralyne, ICG and coralyne/ICG@poly(A)-MSN.

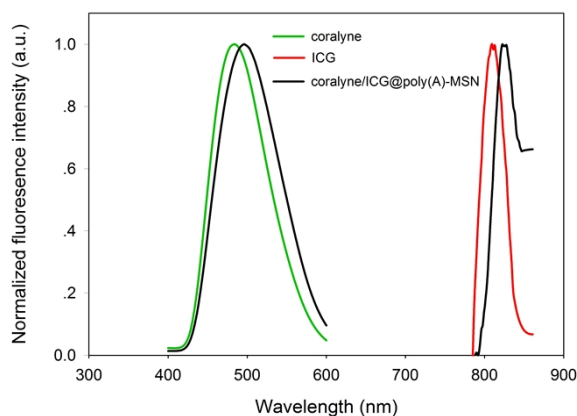

**Fig. S2** The fluorescent spectrum of coralyne, ICG and coralyne/ICG@poly(A)-MSN with excitation at 400 nm (coralyne) or 780 nm (ICG), respectively.

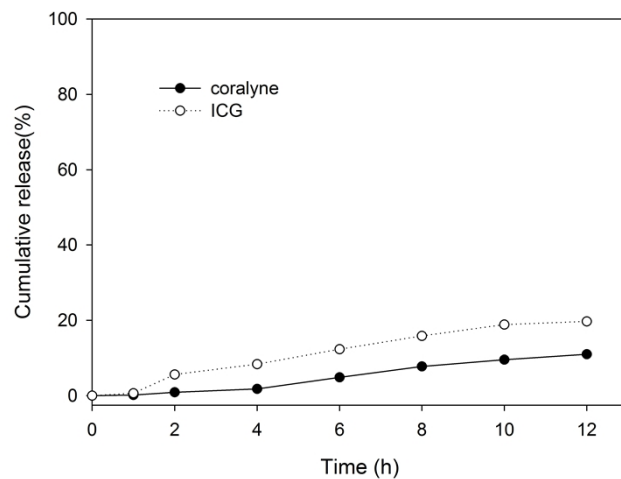

**Fig. S3** The cumulative percent release of cargoes from coralyne/ICG@poly(A)-MSN in full calf bovine serum at 37 °C.

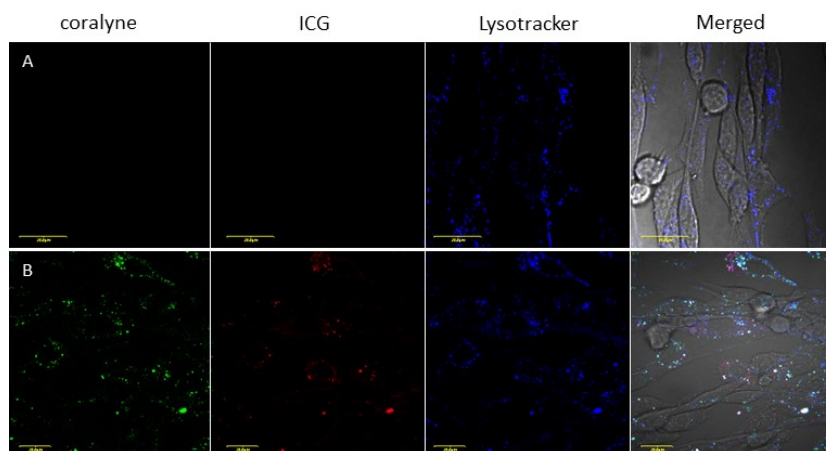

**Fig. S4** The confocal microcopy images of the HepG-2 cells after incubation without (A) or with (B) coralyne/ICG@poly(A)-MSN for 4 h at 37 °C, respectively. Lysotracker Green (blue fluorescence) was used to stain the lysosomes. The scale bar was 20  $\mu\text{m}$ .
